# Supplementary material for: A Novel Multidrug-Resistant Cell Line from an Italian Intrahepatic Cholangiocarcinoma Patient
Source: Cancers (Basel). 2021 Apr 23;13(9):2051. doi: 10.3390/cancers13092051 (PMC8123022; doi:10.3390/cancers13092051)
Supplement: Supplementary file 1 [file cancers-13-02051-s001.zip]

Archive with 4 entries (4 files):
- cancers-1197383-supplementary/cancers-1197383-supplementary.pdf
- cancers-1197383-supplementary/Table S1.xlsx
- cancers-1197383-supplementary/Table S2.xlsx
- cancers-1197383-supplementary/Table S3.xlsx
