# Supplementary material for: A Novel Multidrug-Resistant Cell Line from an Italian Intrahepatic Cholangiocarcinoma Patient
Source: Cancers (Basel). 2021 Apr 23;13(9):2051. doi: 10.3390/cancers13092051 (PMC8123022; doi:10.3390/cancers13092051)
Supplement: Supplementary file 1 [file cancers-13-02051-s001.zip › cancers-1197383-supplementary/Table S1.xlsx]

## Sheet: Table S1
Table S1. Differentally expressed genes in 82.3 cells vs MT-CHC01 cells.
gene symbol	log2FC
CACNA1I	-2.67397
FILIP1L	2.09
SCARA3	-5.08351
RASSF5	2.04486
PLCB4	-3.36443
MACC1	2.61178
VWA2	2.37918
RNF144A	-2.92479
RASSF2	-2.38092
MARK1	-2.08749
GDF15	-3.48822
ARHGEF38	-3.06704
FHOD3	4.47235
IKBKE	2.09913
VAV3	-2.33683
PRR5L	-2.52159
ANKRD33B	-6.02944
SH3YL1	-2.22869
TP53	-3.50813
EYA1	2.61639
CRIP2	2.26408
CST6	4.22334
CTSW	3.66729
NEDD4L	2.28361
POU2F2	2.56559
UTY	2.44009
TGFBR3	-2.3829
ZFYVE28	2.22171
TMEM150B	-2.0891
COCH	-3.17381
GYG2	-2.91877
GPRC5A	-2.60921
CDH17	-5.90704
TUBA1A	4.08076
TRIM31	-3.08365
HLA-DRA	5.39372
CPNE1	-2.15967
SERPINA4	-4.40795
ARPIN	3.45879
PPP2R2A	-2.04935
CD74	6.21077
CALD1	-2.01811
FMNL1	3.64943
ZFYVE9	-4.71697
FGD3	2.09698
PLBD1	-3.89247
TFCP2	-2.21111
AKR7L	-2.36846
GTF2E2	-2.68217
NPNT	-6.13436
SEMA4G	-2.22987
ZC4H2	-2.12181
ZNF90	3.61889
PCDHGA11	-2.77677
ADIPOR2	-2.07617
NRG1	-3.0785
ATP2A3	-2.24955
PROCR	-2.7997
TM6SF1	-3.18335
AIG1	2.10347
HIST1H2BB	-2.67327
TLDC1	2.37466
ZNF253	3.02569
VIPR1	4.19623
TTC39C	2.69947
EPS8L3	-5.96339
DUSP10	2.47916
NTS	-7.28906
MYRF	-2.96728
SIGLEC6	2.33338
ZNF280B	-2.96793
STOX1	-2.28722
SLC44A5	-3.56095
AKAP12	-2.96308
ANGPTL4	2.33906
MAST4	2.3581
CTSE	-4.69172
KCNQ5	-2.61016
CNN3	3.38094
CLU	-5.48205
CTSD	2.03911
HLA-F-AS1	-2.41825
LINC00116	3.78947
PARVB	-2.58047
KLF9	-2.11569
SRC	-2.28122
FUT9	4.43144
NFE2L3	2.85575
MYO1A	-3.20308
ACOT4	2.0858
FRMD6	3.14156
ZNF439	3.35474
NR2F1-AS1	2.78999
CFH	3.44565
TPH1	-2.71464
APLP1	-2.6049
HNF4G	-5.98524
GNG11	-4.42105
FKBP5	-4.09598
OSMR	-2.26099
XDH	2.5302
FGFR4	-6.22427
TMEM169	2.06903
CDKN1A	2.92775
RASSF6	-3.17943
TUSC3	-5.99739
DNAH14	-2.02649
PQLC2L	-2.18559
AKR1C2	-4.31342
SP110	-2.02662
RASA1	3.34199
RNF165	2.14913
MYO3B	2.06001
UBXN10	3.03205
ADAMTS15	5.67911
LOC100132111	2.29967
ZBED6CL	2.45109
RIMKLA	-2.36758
BTNL9	-3.48653
PCDHAC2	-4.03257
CR2	-2.30404
DPP10	-2.64596
FAT4	3.51681
MAP3K7CL	2.54745
IL17RD	2.52354
KLHL3	2.19674
EPHA10	-2.10852
BEX4	-2.72001
CHAC1	-3.91003
PCDHA11	-2.8133
NPC1L1	-2.88921
CTH	-3.02079
CDON	2.71848
GATA3	3.32083
CPM	-4.11234
CELF2	-4.05228
LTBP3	3.95281
DNAJC18	-2.0231
EPDR1	-4.27271
CDK15	3.16619
LPHN2	-7.08566
SYBU	-3.14497
MMP2	7.21726
CCZ1	2.33162
CCDC69	3.60768
PYGO1	-2.60729
ELOVL5	-2.65342
INPP5D	-3.77716
PKDCC	-3.16033
MAMDC2	3.52226
ARHGEF26	-3.85988
PTPRS	3.72151
ITGB2	-2.90626
IKZF3	4.21466
RASSF1	2.1313
SLC25A21	-2.13052
ZNF93	2.89333
BEX2	-2.88235
IL1RAPL2	2.71508
DLL4	-3.20409
TNNI2	2.60034
ARHGAP44	-2.64987
CASP14	2.59123
TRIP6	4.10134
WBP5	-2.33319
SGK2	-4.82341
LGR4	-3.47308
TNFRSF19	-2.56072
XRCC4	-2.24289
DDAH1	-2.48792
IQGAP2	-4.74105
CIITA	2.39077
RNF217	-4.38887
CA12	-2.53118
PLOD2	-2.49363
DTNA	-2.18554
OBSCN	2.88591
HEATR2	2.15954
CHST15	2.30479
MIR205HG	2.17227
SLC1A3	2.03441
CES1	-2.98791
ADAP1	2.14351
SUMF1	2.32464
SOX6	2.14684
GCNT2	-2.0235
HNF1A	-2.99398
SLC43A3	2.41958
IRAK2	2.2628
PSCA	-2.15354
NEK11	2.11729
MITF	-3.77109
C15orf48	2.16405
CYSTM1	-5.07095
RNF144B	-2.18179
PSMG3-AS1	3.36643
BCAT1	-5.98183
APBA2	-4.55886
IFI16	2.51832
AKR1B1	3.96808
CLDN18	-4.19803
HDAC9	2.00723
G0S2	4.30151
ZNF568	2.97657
PCBD1	-2.71597
XIST	-6.98651
MORC4	-2.16735
GLRB	-3.16578
GABRB3	-4.52026
PIWIL1	2.40571
SYNGR1	-2.65639
SEPT3	-2.03528
ZNF879	-3.16437
TTC39A	-2.51217
RFTN1	-2.00694
TFDP2	-2.66227
VIM-AS1	3.4878
MOCS1	-2.25278
ZNF667	3.39629
PTK7	-2.64019
ITGA2	2.04977
VCL	-2.48755
ZG16B	3.42577
SLC4A5	-2.21427
APBB1	-3.06195
HYAL1	-3.60239
BCL11B	-2.56189
GJB1	-6.14884
CACNA2D1	-3.66985
SLC7A7	-3.66118
MAP7D2	2.06716
FERMT2	-5.59364
ADIRF	3.33772
COL13A1	3.48493
PLA2G4F	2.61965
EIF4E3	-2.40434
IGFBP2	-5.1091
HSPG2	-2.0856
PRAME	-4.393
ADAMTS14	2.49572
TACC2	-2.12913
TXNRD1	-2.31865
HCG11	-3.51451
NUDT13	-2.12093
LRRC61	2.31764
NPTXR	2.55995
GRAMD1B	-5.51903
S100A14	-3.73723
NRIP3	-2.61464
SPRR1B	3.75786
MDK	2.09721
HNF4A	-5.61893
LINC00858	-2.04495
PROM2	2.47842
ZNF844	2.62622
FHL1	-2.54263
VSIG1	-9.28351
PTAFR	-3.36294
PFN2	-3.95706
CA2	-5.44452
LINC00865	2.45384
KIAA1586	-3.96812
IL2RG	-3.19562
NDP	2.37197
REC8	-4.25863
ZNF117	2.92894
KIAA1211	-2.7366
MARVELD1	4.33357
MIR614	-2.39548
KRT23	-2.90985
HORMAD1	-3.3501
LOXL4	-2.65593
SLC12A8	-3.1419
VTCN1	-2.7285
EVA1A	3.1837
DYNC2H1	-2.1259
THEM5	2.24214
SLCO4C1	-2.60633
ZFAND2A	2.51833
PCSK9	-2.21222
FAM60A	-2.03596
GLI3	3.33907
CYSRT1	2.2693
FUOM	-2.67552
GAS6	2.15753
C1orf21	-3.40071
BHLHE41	5.23673
FAM117A	-2.00748
PTCHD1	-2.24055
FUZ	2.17742
UBXN11	2.26233
SULT1A1	-2.56654
MAOA	-3.76961
FGFR1	-2.02168
KIAA1244	-2.02706
NUP62CL	-2.34477
SLIT2	2.13242
HEPH	-2.23523
KLK7	2.46394
SLAIN1	-2.84407
ATP6V1C2	-2.26945
OSBPL3	2.08053
ORAI2	2.02994
CCZ1B	2.1645
MSRB3	-2.19526
SCN5A	3.99
NPSR1	-3.95726
NAALADL2	3.06866
ADRA2A	-2.16722
TNC	7.55416
ACOXL	2.8085
ZNF815P	2.32156
FAM149A	-3.19012
KIAA0513	-2.35432
ANO5	-4.88839
AMZ1	2.0221
ZBTB10	-3.88149
TEX15	-5.81133
ZSCAN18	3.80178
NMNAT3	-2.55948
MICALL2	3.53427
LOC100996579	2.55691
FN1	4.07692
PRKAR1B	3.44654
FAR2	-3.39052
PAX9	-2.93454
CASZ1	-2.71689
CD274	3.19892
PDGFD	-3.56412
SCIN	-4.30157
CUBN	2.20618
TM4SF5	-3.04922
DCAF12L1	-4.12731
TMEM37	-3.07031
NDRG1	-2.00809
AOC1	-2.8726
LINC00899	2.27307
AFAP1-AS1	-2.61969
DKFZP434K028	-2.17385
RUNX1-IT1	3.70625
TRHDE-AS1	-2.80736
FOXD1	-2.56585
ITGB8	2.2547
SLC44A4	-2.68717
CD24	-2.65046
ZNF204P	-2.57042
GSTM3	-5.8178
CACNA1D	-2.10403
TDRD6	2.97817
KRT14	2.47551
HOXA13	-2.42038
METTL7B	-3.29453
FGD4	-2.09574
SCRN1	2.45915
NOX5	2.39936
C6orf99	-2.11818
ACTG1	-2.46315
SIAE	2.20215
STRA6	3.12246
IL1R2	-3.08094
ALDH2	-2.97389
GLIS3	-2.63399
ME3	2.28495
PIK3IP1	2.40322
NALCN	-3.59458
MMRN2	3.81225
MXRA8	2.92615
PCDHGA4	-2.12287
KLHL7	2.16245
FOS	-2.70642
THSD4	3.75664
PAX8	2.13433
PLCE1	-4.05484
ISYNA1	3.26431
C7orf50	2.71002
CRACR2B	2.04758
LINC00707	-2.08556
GPX2	-6.19096
ZNF85	2.59384
GNA12	2.21696
MPZL2	2.24014
KLK11	-5.86886
DNM1L	-2.06239
ZNF827	2.1816
RASSF9	-5.03806
P2RX6	2.21465
HUNK	-2.364
GALNT5	2.43455
TCHH	2.27251
TMOD2	2.33774
GABRP	-6.91
FAM155A	-3.05756
ST6GALNAC2	3.37716
ALDOC	-2.39865
GGT1	-2.12663
MGP	5.23622
OXCT1	3.65608
CPED1	6.24602
TMEM25	2.32628
SHH	2.18954
AGR2	-3.72783
HAS2	4.89737
EYA2	3.19828
SEMA3C	2.54451
GPR35	-4.61925
RASGRP1	-2.55896
BMP8B	-2.38075
HMHA1	2.50557
PRLR	2.00618
IFI6	-2.67552
LTBP1	-2.35095
CHST10	-2.71329
ZNF334	3.46749
GCNT4	-3.44866
MYH15	3.53305
SPDEF	-2.35029
TSPAN15	-2.68679
NFATC2	-2.05535
TSPAN12	-2.95893
LDOC1	-2.83721
TACSTD2	2.01493
C6orf223	-3.12714
TSPAN18	-3.3592
COL4A5	-4.2113
ACE2	-2.51319
MIPOL1	-3.41363
LCN2	2.35417
HDGFRP3	-6.42672
GAL	-4.30469
FAXC	-2.16306
AIM1	2.50996
FEZF1-AS1	-2.08116
SMARCA1	-5.07705
SLC13A5	2.49889
SOCS2	3.11558
GOLGA8A	-5.15707
LPCAT1	-2.99306
CLUAP1	2.54816
LOC400043	-2.63217
GDA	-2.76056
HIST1H3E	2.08112
TGM2	3.24597
NAV1	3.7898
BAG2	-2.529
CYP2S1	-3.71755
PCDH7	-2.59934
ZNF667-AS1	3.51641
SERPINB7	2.35097
PTPRR	-3.77979
ESRRG	2.15429
PTX3	3.47823
SATB2	2.23297
ALDH1L1	2.56536
TLE2	2.23259
TLR4	4.91188
PSAPL1	-3.04283
MYO5A	-2.298
BTG2	-2.26224
ZNF862	2.49398
MX1	-2.68376
IYD	-2.73626
PARD3B	-3.16554
S100A4	3.61215
PCED1A	2.20045
TSPYL5	-4.91212
AHR	3.61677
PROM1	-3.32405
RNF24	3.38809
CNTNAP2	-3.20556
ATP8B3	2.34848
ANKS4B	-3.49948
TFF2	-2.88641
ZFP36L2	-2.11085
ARL4C	3.00173
NGFRAP1	-5.52792
DHRS4-AS1	2.41352
TP73-AS1	-2.15627
ANK3	-4.9661
CMBL	-2.00427
PDE2A	2.14697
NHP2	-2.37606
RNF125	2.6009
DAPK1	-3.5818
PPP1R18	3.0715
ZNF418	3.08783
PROS1	-2.34876
PRNP	2.63787
IPO7	-2.15657
ALDH1A2	-2.43941
RERG	-4.17178
DHRS9	4.68218
FANK1	2.18612
SERPINH1	5.09462
ISM1	3.81211
SIRPA	-2.22976
SLC38A4	2.58472
PDIA6	-2.10913
PLCH1	-3.08139
SEMA3E	-3.56164
SLC20A2	-2.51816
OAS2	-2.39586
TOX3	-4.60777
ZNF471	2.23966
SLC38A5	3.69209
HSPA12A	-2.1292
LPXN	2.04969
FAM135A	-2.54364
TMTC1	-6.44192
GPR63	-2.33703
CAPN13	-3.55121
TESC	-4.2026
LTBP4	2.17935
DZIP1L	-2.39011
PER3	2.30046
FURIN	2.01585
EPGN	4.23018
WDR72	-2.00821
SYT13	-4.92859
TRAF1	2.48949
ASRGL1	-2.06438
ITGB6	3.02625
CPQ	-2.25434
IL1A	3.35876
MUC13	-6.32684
SFRP1	-4.35589
LOC100288778	2.43672
CALHM2	3.71507
ARHGAP5-AS1	2.07555
LARGE	-3.0206
RHOV	-2.26213
ROBO1	-4.2642
CYP1A1	3.69843
ZNF43	4.26189
RHOBTB1	-4.76766
HOXB9	-2.98301
PSMG3	2.25568
ACTR3C	2.13238
PSAT1	-6.86789
PLEKHO1	-2.23294
UPP1	2.36088
LOC100506497	2.18612
CYP3A5	-2.65673
HLA-DQB1	2.08605
RAB3B	-4.72896
GBP1	-3.77597
HLA-DRB1	3.90432
TFF1	-4.2135
TAGLN	-3.7922
SLC39A14	-2.18991
EPB41L3	3.72941
C10orf32	2.24253
AKR1C1	-2.95689
FLG	2.6469
FOXO1	-2.30781
SORCS2	2.93709
ALPK3	2.95374
MFI2	4.5272
C1QTNF1	2.81473
TBX18	5.26599
SETBP1	2.42269
AP5Z1	2.03882
MYL9	-4.78623
FAM133CP	-2.49888
LINC00668	-2.10689
CCDC92	2.18339
VPS4B	2.03558
ZNF718	2.63228
SNORD116-20	2.17858
CADM1	-4.87239
VCAN	2.33092
ST6GALNAC1	-3.16975
GPRC5B	-3.25892
CYB5R2	-4.09456
RARRES1	4.3495
PRSS21	-4.18338
LIFR	-5.8765
GRIN1	2.02581
TTC39B	-2.73743
KIAA1551	-2.52984
C14orf105	-3.18115
NUDT11	-2.4831
CNTN3	2.97908
KIAA1462	3.05071
C7orf26	2.01153
TMEM98	-2.49267
MYO7A	-2.07768
SUN1	2.83201
CAPN5	-2.06361
BNIP3	-3.02094
TRIM10	-2.18649
RHPN2	-2.10774
TRIM5	-2.03395
APCDD1	4.22239
ST6GALNAC3	-3.36635
KLK10	-3.18039
FZD3	-4.56598
DGKG	3.29242
CEBPA	-2.17796
ERN2	-3.03296
SLC2A12	3.07511
QPRT	-4.78992
ADAM8	2.31158
ISL2	-2.05695
ZCCHC24	2.719
P2RY1	-4.38503
LY6D	-4.57108
FAM155B	-2.39203
SLC37A2	6.23984
RNASE1	2.46098
FAM46A	-3.04535
PTGS1	-2.27686
DCLK1	4.14849
ZBED1	-2.35982
SERPINA3	-5.60137
ABCA7	3.59788
SLC4A4	-3.66423
CATSPERB	-2.06176
ALOX5	2.56101
TECPR1	2.01229
PDLIM4	3.33459
C17orf96	-2.30822
STK38L	-2.35009
VGLL3	2.21299
FKBP4	-2.62896
MUC6	2.05815
FADS2	-3.384
DUSP1	-3.85155
GCAT	-2.09391
EXTL3	-2.2984
SYT12	2.63687
KCTD17	-3.32901
LPAR1	-2.04773
SYNE4	2.00392
TOR4A	-2.03528
RBP1	4.72848
IL17RB	2.49144
FAM109A	-2.0365
SIPA1L2	-3.05566
SERPINB5	2.26921
MUC16	2.1925
DNMT3A	-2.52451
ZNF665	2.19326
ANTXR2	5.20942
FOXA3	-4.2595
TM4SF4	-9.02511
AASS	-2.31424
SPOCK1	3.53195
PLAC8	-2.1592
MFAP5	-3.02068
TMEM41B	-2.4994
RRP8	-2.05101
FAM198B	3.34679
PPFIBP2	-2.04788
C2orf72	-3.15709
FBLIM1	-2.06174
S100P	-2.11188
S100A2	4.01639
ASPHD1	-2.19766
MCU	-3.37149
SPG20	-5.25013
DNM1	2.29205
ANXA8	-2.81494
COL7A1	2.70937
ARHGAP24	-2.57498
ATL1	2.41545
RAET1E	2.28959
NT5E	3.0084
SLC27A2	-3.92292
STEAP4	4.73297
CYP1B1	5.19241
KIAA1324L	-4.93183
RHOBTB3	3.0563
LINC00920	2.04069
PRKG1	-2.27498
IGF2BP1	-4.02551
RAC2	2.4645
USH1C	-5.27059
KRT13	-2.01384
FSCN1	3.6275
SNCG	3.74064
SLC28A3	-2.37669
SERPINA1	3.62908
TMEM139	2.26122
EVC	-2.46784
ZFAND4	-2.8989
COL6A2	-3.38748
ZNF415	3.84732
SLC19A3	-4.04288
UGT2A3	-2.26679
KIF21B	-2.68632
DMXL2	2.13452
PRAP1	-2.08973
PXDN	-5.71192
MCAM	3.27297
PAG1	3.38817
CYBRD1	2.37041
GLI2	-2.25391
RBPMS	-2.29913
SLC9A1	-2.54277
PLCB2	-3.59339
PIK3C2G	-5.95535
STC2	-6.67887
TP53I11	-4.21153
MCF2L	-2.4785
DEPTOR	-2.07628
SNORD3A	-2.06182
C17orf51	-2.10909
PLA2G3	-2.00905
CRABP2	3.64046
MT2A	3.90712
DMC1	2.36623
KHDC1	-2.14289
IL20RB	-2.898
GJC1	-3.64568
EPHB6	3.0886
EPHB2	2.57334
PARP3	2.39598
FZR1	2.19075
RIMS4	-2.34563
HIST1H3J	-2.44299
MR1	2.4583
MICU3	-2.16858
GSR	-2.5225
AZGP1	2.94538
IGFBP6	2.68633
LUM	-2.82449
C5	3.31279
EYA4	-3.54456
GRK6	-2.12169
PTK6	2.20632
UGT1A6	-3.03074
CACNA1H	-3.34952
WDR17	-3.3668
GPR180	-2.24917
ST6GAL1	-2.41226
CEACAM5	-3.35578
SPINK4	-2.77119
FBXO6	-2.35376
SOWAHB	2.56947
CALB2	4.62032
ATF3	-2.00775
ZNF433	2.27737
EMP3	2.45145
KCNS3	-4.00448
MMP7	-6.16897
ARHGAP31	3.13287
SYNM	-2.15567
SLC3A1	-3.85442
C3	5.28959
ZNF736	4.6744
FAM213B	-2.14636
ISG20	-2.37073
BMP4	2.09113
BMPR1B	-3.44138
SLC46A3	-3.91416
DPYSL3	-5.12446
FOXA1	-2.99022
WIPF1	-3.77594
CYP2C18	-4.84743
ADM	-2.27051
WRN	-2.55635
TGFB1	2.39953
DKK3	-2.12438
GATA6-AS1	-2.16697
NT5C3B	-2.60811
PTPRG	3.02222
SKAP2	2.11204
PTPRD	-2.06508
SLFN12	2.80623
QPCT	-2.43845
LINC00669	-2.03509
TRIM58	-3.1122
SLC6A20	-4.42009
FLJ45513	-2.30645
ZNF790	2.54466
JARID2	2.03125
LINC00909	2.15663
GLP1R	4.25482
COL4A3	-2.42261
ASNS	-3.00084
TK2	2.52128
EGFR	2.30546
ADA	-3.06376
IRF8	-4.54445
ANKRD6	-3.52459
RAPGEFL1	-3.14981
EVL	-2.13535
HERC5	-2.86424
HRASLS5	2.59652
CARD11	2.64019
COL27A1	-3.35765
OR7E91P	2.26497
PPP2R2C	-2.47791
ACSM3	-2.69462
ZNF354C	-4.2195
CDR2L	-2.21221
THBD	3.64706
HHEX	-2.41444
PREP	-2.94919
CDC42EP5	2.72351
HLA-DRB6	2.40769
LYSMD2	2.60181
KCNQ1	-3.14494
PAIP2B	-3.16383
UCA1	3.09504
COL16A1	2.98074
BCAR3	2.03826
HLA-DPA1	4.42007
ZIC5	-2.67126
WNT3	-2.42711
SPTLC3	2.85988
MYH16	2.80868
PADI2	2.81742
SLC7A11-AS1	-2.20265
ISPD	2.73392
ADAMTS12	-4.08776
NUAK2	-2.83379
FGFR3	-2.47688
TMEM158	3.62869
SLC7A11	-2.52763
PLCB1	-3.06746
GABARAPL1	-2.1763
TRPM8	2.09011
PLEKHG4	-2.89579
EVI2B	2.23295
TXNIP	2.76318
CD27-AS1	2.00252
MILR1	2.62807
HHLA2	-2.74472
HAVCR1	-2.95639
FCHO1	2.37831
ZNF829	3.20108
PCDH20	-3.44405
MYO3A	-2.21424
LBH	-3.84229
REEP1	-2.23096
MARCKSL1	-2.49249
DPCR1	-6.5827
BTBD16	-3.12321
CXorf57	-2.05476
SOBP	3.63957
SLC13A3	2.25392
IFITM1	-2.01385
ZNF528	2.47757
DSE	4.02944
SH3BGRL2	-2.88641
NEO1	-3.38851
ITGA5	-3.11128
NR1H3	2.04434
GNAI1	-3.41371
KITLG	-2.02106
ANPEP	9.08517
MPDZ	-4.59093
ASMTL	-2.26662
SLC15A2	-2.38117
PLIN2	3.61733
ZNF365	3.03934
LAMA4	3.44873
DENND5A	-3.45586
PRTFDC1	3.59199
CDH4	4.20436
SYT8	3.07384
LINC01116	-2.77025
ANKRD18A	-2.07584
RAI14	-2.79305
TLR5	2.38074
FOXQ1	6.52929
CAMK2N2	2.21199
SLC35G1	-2.53265
CACNG4	-2.4174
LOC374443	2.07386
TNS1	-2.81746
APCDD1L	2.11593
GAS6-AS2	2.95883
TPM2	-2.98141
ALDH1A3	4.6378
BATF	3.4993
LINC01559	-4.10273
ZNF703	2.12984
DPYD	2.79478
INSL4	-2.02651
ISG15	-3.03737
SSPN	4.92435
SPRR3	2.31911
SLC20A1	2.37591
SLC43A1	-3.24169
LOC100507431	2.98916
CCDC152	3.18398
PKHD1	-2.06828
TXLNGY	2.31415
TEAD2	-3.27948
SGPP2	-4.53286
FAM129A	3.72015
BAMBI	-3.81236
TFPI2	-7.76348
MYLK	-3.22386
CDIP1	-2.69236
SMO	-2.25013
KRT20	-6.02914
LGALS4	-7.53356
PNMA2	-5.9367
BCL2	2.24058
CYP39A1	3.37788
EFEMP2	2.17784
ZBTB47	2.8131
PCDH9	-2.15607
CLDN2	-3.70119
AFAP1L2	2.617
HNF1B	-3.87101
SPP1	-3.63351
FRMD4B	2.95735
FAM155A-IT1	-2.13749
MACC1-AS1	2.46276
ARRB2	-2.16136
NAV3	3.33579
ACOT2	2.83717
EDN1	-3.27241
HLA-DRB5	4.93734
RARRES2	3.42236
KLHL29	-2.95825
MTCL1	-3.40171
UPK1B	-7.23359
CHN2	2.75746
LINC01239	2.32478
LOXL1-AS1	2.31458
FBXO32	2.33681
ABCA12	-2.23154
BAIAP3	2.54188
DHX32	2.27788
ZNF532	2.19749
NR1I2	-2.5807
ARSE	-3.64099
AR	-4.07501
CABP4	3.26319
FAM169A	-3.51797
COL4A4	-3.47277
ME1	-2.67275
MESP1	3.7293
BARX2	-4.02459
BCAS1	-3.7265
LIPE	2.16709
COL8A1	5.46763
EGLN3	-3.33134
ATF7IP2	-2.61405
DGAT2	-2.05643
HCAR1	4.85715
CDKN2C	2.28882
IFT20	-2.19115
ZNF347	4.23842
S100A9	4.46172
PTPRE	2.80722
CASP1	-2.10496
DCBLD2	2.96179
ADAMTS9	3.92534
LYPD2	-5.38019
PI3	-4.19025
FGF2	-3.55008
CTGF	-2.69917
MLLT3	-3.29906
TIMP3	5.89631
CDC42EP3	2.73483
NRCAM	-2.69054
CAPS	2.03965
LINC00540	2.33879
ANXA8L1	-3.25592
PIP5K1B	-2.84216
ILDR1	-2.47848
GNAS-AS1	-2.21475
ADAMTS2	-2.14645
RASGRF2	-2.96126
GGH	-6.58615
GAL3ST1	-2.05695
PTGFRN	-2.05641
VDAC3	-2.14012
SLITRK4	-2.70541
EPPK1	-2.76813
STOX2	-3.05063
FAM20C	3.91096
ZFY	2.45251
CALHM3	5.8283
PLAT	3.31944
SFTA2	-5.89327
SCN3A	-3.65721
ITM2A	-3.8519
FUT4	-2.96279
CCAT1	-4.1104
CD40	3.91351
HKDC1	-3.87086
LOC100507642	4.15934
PSMD5-AS1	2.30128
COLGALT2	-2.24313
PDK4	2.46217
APOL1	-3.98997
TH	2.07267
EEF1A2	-3.49137
FBP1	3.07948
SLC35A1	-2.44957
DDX3Y	2.77403
USP9Y	3.11541
LOC441666	-3.90385
FAM86FP	2.55737
FAM86DP	2.71393
AREG	3.2013
FES	3.57658
CD300A	3.90556
GPR176	3.30643
PCDHA12	-3.30607
ZCCHC11	-5.33377
MMP14	2.9753
PREX1	-2.28849
LOC101927021	2.19357
BLMH	-4.39022
ADAMTS9-AS1	2.579
MYOM1	-2.01759
TSHZ3	2.80999
RGCC	-2.55101
TPRXL	-2.37393
DACH1	-2.50486
MAP10	-2.02242
HES2	2.60387
GSDMB	-3.69931
DCDC2	-6.22388
GPR110	2.57095
ZNF662	4.34086
SHC3	4.13849
FA2H	-3.66519
ZMAT1	2.22984
ZNF37A	-2.4598
TLR1	3.27213
SDC2	-2.0204
PGM1	2.30667
FGD2	3.18625
LYNX1	-3.7748
C1orf115	-3.62026
ECHDC3	-3.32179
TMEM156	-2.75317
PLA2G7	3.2641
DNAH2	2.31996
MAP1B	-5.33072
ZNF682	2.74381
NID1	-3.38169
HSD3BP4	2.70271
SOSTDC1	2.89501
FBXO16	-2.08973
GAN	-2.02544
FKBP10	5.10932
PDE9A	-2.63187
PALM	-2.13791
MIR4458HG	-4.24522
ZNF711	-2.83843
PEX6	2.12433
ARL6IP5	2.74791
IL1B	3.04468
FGF18	-2.74538
EIF5A2	-2.76834
FAM19A4	-2.44927
SLC16A14	-4.52421
FLJ43879	2.71795
ARHGAP4	4.77986
WASF3	-3.8766
LRP12	-4.81471
PHLDA1	2.28587
PHGDH	-5.9063
PNMA1	2.0004
C4orf19	-2.01159
ZNF518B	-3.75471
HLA-DPB1	2.31537
NNMT	-2.68459
SIX1	-2.43223
TMED9	-2.03944
FBXO17	-2.44703
APOBEC3G	4.24718
DNAJC22	-2.84159
SVIL	2.42034
FAM84A	-2.48845
ETV1	2.05381
SLCO2B1	-3.70002
HSPA2	-2.50717
SLC7A5	-2.57414
FYN	-2.29027
NDST3	2.81507
EPB41L4B	-2.40065
PALLD	2.65393
GPAM	-5.15222
KLHL4	2.25563
SLFN5	2.26889
DENND5B	-3.63376
LMOD3	2.41451
CAPN9	-2.56973
VAV1	-3.82689
ZDHHC4	2.12329
TUB	-4.79964
PGM2L1	2.7463
MCC	2.12912
ZNF697	2.31329
TRHDE	-3.47254
BCO1	-3.10547
SPA17	2.52985
NFIX	2.05067
GPC4	-3.94217
CHPT1	-2.36574
CAPN12	-2.7669
SLFN13	3.66032
TDRP	-3.43777
DUSP27	-2.49188
NOTCH3	-4.19505
KDELC2	3.57469
LIPK	2.40769
B3GAT1	2.14708
SNAI2	4.01768
AGR3	-3.04383
PCDHGB1	-3.03961
DOCK5	-2.12014
VTRNA1-3	-2.29756
RINL	2.22769
SLC2A10	2.08813
TRIM15	-3.12132
LOC101927811	2.29944
PELI2	-4.83546
HCG4B	2.50268
CLEC11A	2.62825
PCSK5	-3.68656
GOLT1A	2.72828
ATP13A4	-2.17321
LYPD3	2.20858
HPGD	-3.97396
AMBP	-2.9007
LAMP3	-2.37127
ABCC2	-4.26279
G6PD	-2.063
AKR7A3	-2.88714
CSF2	4.13787
ADAMTS6	2.42433
FAM174B	-2.65291
SLC22A20	3.16574
MBP	2.99344
MATN3	-2.42768
LMO7	-2.93931
SH3GL3	-4.31266
EDA	-3.35122
MPP1	2.08657
HLA-G	-2.54408
ZNF362	2.5434
PMEPA1	2.36164
INHBA	2.05099
PCOLCE2	-2.3681
SUB1	-2.16746
CCNJL	-4.58321
KAL1	-3.00829
PPP1R3C	-4.17662
SFTA1P	-3.06096
CHDH	2.16078
SUSD5	-2.62111
LRRC56	2.18727
ZNF320	2.45932
CYP2B6	-3.55202
LOXL1	4.32421
HOXB13	-2.12271
EIF3M	-2.06939
KIAA1549L	-3.69589
ZNF215	-3.03163
NR2F1	3.1775
RPS4Y1	3.41083
NPR1	-2.07863
ORAI3	2.64607
CD83	2.33106
OXTR	3.09294
DKK1	-2.37469
CYFIP2	-3.76586
SEMA4C	2.08993
PARM1	-3.19833
NBPF14	2.07374
CYP4V2	2.5128
PIK3AP1	-2.05832
GPR153	4.75112
MIR100HG	4.84191
MXRA5	3.41362
MUC5B	-2.98378
FAM50B	-2.09117
LYZ	-2.6903
HIST1H4D	-5.93997
RPS6KA6	-4.00288
KCNMB4	-2.20034
BASP1	-3.57016
GLO1	-2.12957
LPCAT2	2.65221
TMEM71	4.59587
KCNN4	2.41487
ADAMTSL3	-2.60416
SYCP2	2.31932
KBTBD11	-2.35369
VIL1	-7.10932
TLR6	5.38463
NOG	4.41434
CXCL3	-2.16463
GCNT3	-7.1113
RPS6KA2	3.93112
PDE3B	-3.19205
RPS7	-2.11997
CXCL5	5.35964
CEACAM6	-5.96176
TPST1	-4.27787
FLJ32255	-2.46977
CXCL17	3.84825
SULT1C2	-5.26825
HOXA10	-2.53954
CCDC74A	2.49394
HIST2H3D	3.44051
GJB2	2.94095
TSHZ1	2.09812
C12orf75	-5.90027
MEX3C	2.38991
ZNF608	2.44932
MVB12B	-3.30351
TMEM47	-2.21792
LTBP2	4.91739
GATA6	-2.04871
GPR37	-2.21755
KCNE3	-2.87029
EREG	5.72259
LDHB	-10.2851
AXIN2	-2.28117
EML1	-2.12393
IL22RA1	-3.01049
RAB32	-2.41855
RAB40B	-2.17578
FAM105A	-4.07837
GLDC	-2.44351
PRR26	-3.29463
SMIM14	2.54026
IFNLR1	-2.0587
ANXA10	-6.78092
WSCD2	2.52163
C16orf54	4.303
LOC344887	-3.09926
AJAP1	-2.15557
FAM134B	-3.32074
ZNF681	4.15669
ICA1	2.39644
MMP9	6.45789
GPRIN3	-2.91249
SLC16A9	-2.96474
BPIFB1	-4.23014
MIA	2.59548
VIM	6.29282
CHMP1B2P	-3.37077
C3orf67	2.26182
LONRF2	-2.44836
PRSS2	2.18495
PRSS1	-3.51401
KRT17	-4.78013
PRKD3	-3.36504
ELOVL7	-2.131
MAK16	-2.01369
ELOVL4	-2.87013
KIF26A	-3.14968
GIPC2	-3.05526
PPM1H	-3.55379
TSPAN4	2.19154
MICALCL	-2.14845
ZC3H6	2.60356
SNHG5	-3.21664
SCARNA5	2.03164
HAS2-AS1	2.8003
HERC2P2	-2.61852
ZNF818P	4.52551
MSX1	-3.1248
HIST2H2BF	6.55998
UNC5A	-2.66311
DPYSL2	-2.17599
LINC00665	3.89616
GPR87	5.38381
RIMKLB	-2.67463
DOCK11	-2.53355
KIF12	-2.97796
OLFM1	-4.50025
TNS3	2.01951
ANXA4	-2.78712
C4BPB	-4.54975
LGALS1	4.60203
INHBB	-6.18357
ZNF880	2.87896
OAF	2.88447
VSTM2L	3.07639
FAM126A	2.67459
DIP2C	-4.45393
DPP4	-5.55594
BAIAP2L2	-4.09399
POF1B	-2.94967
ST3GAL5	3.28279
AATK	-2.20992
WFDC2	5.72842
TNNC1	-2.89379
PLEKHH2	-3.15008
AMER1	-2.37724
ZNF785	2.07881
IL1RL2	2.28431
ZNF618	-2.38159
COL4A2	-7.11144
COL4A1	-6.42339
CD81	-2.40783
KCTD12	2.45667
TAAR1	-2.76049
TREML2	2.86765
MGAM	-2.16446
GYLTL1B	-2.56154
LRP3	-2.68266
HSPB1	2.68604
B4GALNT4	-4.29982
GRID1	-2.29156
TSPAN8	-8.90259
ZNF69	2.6953
DDIT4	-2.01805
FBXO41	-2.69352
HGD	-5.1038
SLITRK6	-4.61787
LIX1L	2.49967
GATA4	-2.53379
ABCA3	3.36826
SLC15A1	-2.41366
MAP9	-3.20269
KLHL35	2.19271
CCDC88C	2.23928
MESP2	2.44699
AIM1L	-2.01504
THSD7B	-3.72864
EFEMP1	2.17135
SAMD5	-3.5729
PPAPDC1A	2.29628
SCN2A	-6.01768
ZBTB7C	2.92798
ABCC4	-3.4761
C17orf97	2.3874
ZNF793	3.9194
TRNP1	-4.88993
ZSCAN23	-2.98476
NCMAP	-3.46155
HRNR	2.1055
GOLGA7B	2.64074
ZIK1	3.37348
TTC7B	-2.94232
SH3PXD2B	-3.10131
CT83	-4.34823
IRF5	-2.99597
ERV3-1	2.57891
PLCXD3	4.25517
MYLK4	2.5464
NRARP	-3.14092
BCL2L15	-4.03996
FAM83B	-2.91218
FAM109B	3.78376
PPP2CB	-2.02598
BLID	2.35442
ZNF470	2.75269
ZNF429	3.23689
NCCRP1	4.48123
FER1L6	-4.64435
TSPAN33	-2.15232
LOC100506499	2.08638
LOC101927136	-4.9166
GNA15	2.7122
FAM120C	2.08312
SLC6A14	-7.59193
MOXD1	-2.22197
FREM2	-4.07422
MCTP1	2.6016
CD109	3.70882
CASC19	-2.22567
LINC01521	2.0669
KCNG1	-2.5667
LINC00392	-2.08446
ZNF793-AS1	2.3505
C3orf14	-3.25853
LOC389602	2.03133
STAC	-5.02128
GJA1	-3.20668
PAPL	2.31341
CYP27C1	3.95053
FAT3	-4.35402
CEMIP	-3.06046
LINC01468	-3.73456
LOC100507420	2.17247
LOC100996583	-2.15953
SPINK1	-2.44539
LOC151121	-2.13791
BICC1	-3.35701
ZNF570	2.52084
NUDT12	-5.78855
SLC9B2	-3.29355
ERP27	2.43622
CIART	3.45818
FOSL1	2.20127
CD55	-3.67065
ZNF91	2.35025
LOC100419583	2.4355
MYEF2	-3.14155
LOC101929128	-4.89935
CYP2C19	-2.30546
VEGFC	3.28983
C1orf186	-2.28497
LINC01322	-2.00127
SNX29	2.01016
MED12L	-3.04942
LOC101928353	-3.07784
LOC101928223	-2.01423
LOC101929771	2.08673
