# Supplementary material for: A Novel Multidrug-Resistant Cell Line from an Italian Intrahepatic Cholangiocarcinoma Patient
Source: Cancers (Basel). 2021 Apr 23;13(9):2051. doi: 10.3390/cancers13092051 (PMC8123022; doi:10.3390/cancers13092051)
Supplement: Supplementary file 1 [file cancers-13-02051-s001.zip › cancers-1197383-supplementary/Table S2.xlsx]

## Sheet: Table S2
Table S2A: Pathway maps enriched for up-regulated genes.
	Pathway maps	p-value	genes
1	Immune response_Alternative complement pathway	4.60089e-12	C5aR, C5, PTX3, Factor H, C3a, C3, C3b, C5a, C5b, C3aR, iC3b, C3dg, C3c
2	Immune response_Lectin induced complement pathway	4.13958e-11	MBL2, C5aR, C5, C3a, C3, C3b, C5a, C5b, C3aR, iC3b, C3dg, C3c
3	Alternative complement cascade disruption in age-related macular degeneration	7.08207e-11	C5aR, C5, Factor H, C3a, C3, C3b, C5a, C5b, C3aR, iC3b
4	Complement pathway disruption in thrombotic microangiopathy	8.98289e-10	C5aR, C5, IL-1 beta, Factor H, C3a, C3, C3b, C5a, C5b, C3aR
5	Immune response_Classical complement pathway	1.47191e-09	C5aR, C5, C3a, C3, C3b, C5a, C5b, C3aR, iC3b, C3dg, C3c
6	Plasminogen activators signaling in pancreatic cancer	6.23417e-09	Fra-1, Galectin-1, PLAT (TPA), TGF-beta 1, EGFR, IL-1 alpha, MMP-9, MMP-14, MMP-2
7	Inflammatory mechanisms of pancreatic cancerogenesis	2.00211e-08	IL-1 beta, EGFR, IL-1 alpha, MMP-9, TLR4, SHH, CD40(TNFRSF5), Bcl-2, ENA-78, CD40L(TNFSF5), MMP-2
8	Cell adhesion_ECM remodeling	3.23665e-08	PLAT (TPA), Fibronectin, Kallikrein 1, EGFR, LAMA4, MMP-9, TIMP3, MMP-14, MMP-2, Versican
9	Vascular endothelial cell damage in SLE	1.25173e-07	C5aR, IL-1 beta, Fibronectin, TGF-beta 1, C3a, IL-1 alpha, GM-CSF, C5a, FN14(TNFRSF12A), PD-L1
10	Development_Regulation of epithelial-to-mesenchymal transition (EMT)	1.46107e-07	IL-1 beta, Fibronectin, Vimentin, TGF-beta 1, SLUG, EGFR, MMP-9, FGFR1, Bcl-2, MMP-2
11	Renal tubulointerstitial injury in Lupus Nephritis	1.70058e-07	IL-1 beta, Fibronectin, Vimentin, TGF-beta 1, HAS2, GM-CSF, CD40(TNFRSF5), FN14(TNFRSF12A), CD40L(TNFSF5), TIG2
12	Proinflammatory cytokine production by Th17 cells in asthma	2.97724e-07	C5aR, C5, IL-1 beta, GATA-3, TGF-beta 1, C3a, C3, C5a, C3aR
13	Stromal-epithelial interaction in Prostate Cancer	5.49358e-07	Fibronectin, Tenascin-C, Vimentin, TGF-beta 1, MMP-9, FGFR1, MMP-2, Versican
14	Glomerular injury in Lupus Nephritis	5.71008e-07	C5aR, IL-1 beta, Fibronectin, C3a, HAS2, NGAL, MMP-9, GM-CSF, C5a, FN14(TNFRSF12A), Bcl-2
15	TGF-beta 1-mediated induction of EMT in normal and asthmatic airway epithelium	8.00457e-07	IL-1 beta, Fibronectin, Tenascin-C, Vimentin, TGF-beta 1, SLUG, MMP-9, MMP-2
16	TGF-beta signaling via SMADs in breast cancer	1.35757e-06	ANGPTL4, TGF-beta 1, FOXQ1 (HFH1), SLUG, MMP-9, MTS1 (S100A4), Fascin, MMP-14
17	Role of alpha-V/ beta-6 integrin in colorectal cancer	2.11726e-06	Fibronectin, TGF-beta 1, ITGB6, MMP-9, Bcl-2, MMP-2
18	Disruption of apoptosis, proliferation and shedding of epithelial cells in asthma	4.04334e-06	p21, IL-1 beta, TGF-beta 1, EGFR, Amphiregulin, IL-1 alpha, MMP-9, Bcl-2
19	IL-1 beta- and Endothelin-1-induced fibroblast/ myofibroblast migration and extracellular matrix production in asthmatic airways	5.2272e-06	IL-1 beta, Fibronectin, HAS2, IL-1 alpha, TIMP3, MMP-2, Versican
20	Immune response_Naive CD4+ T cell differentiation	1.37279e-05	AHR, IL-1 beta, GATA-3, TGF-beta 1, DEC2, CD40(TNFRSF5), CD40L(TNFSF5)
21	SHH signaling in colorectal cancer	1.37369e-05	p21, Vimentin, GLI-3R, SHH, Bcl-2, GLI-3
22	Hedgehog signaling in pancreatic cancer	1.66617e-05	p21, IL-1 beta, TGF-beta 1, MMP-9, SHH, Bcl-2
23	Stimulation of TGF-beta signaling in lung cancer	1.83321e-05	IL-1 beta, Fibronectin, Vimentin, TGF-beta 1, SLUG, MMP-9, MMP-2
24	SHH signaling in melanoma	2.00689e-05	Vimentin, TGF-beta 1, SLUG, MMP-9, SHH, MMP-2
25	B-regulatory cells and tumor cells intercellular interaction	2.08541e-05	IL-1 beta, TGF-beta 1, MCAM, TLR4, GM-CSF, CD40(TNFRSF5), PD-L1, CD40L(TNFSF5)
26	Disruption of epithelial layer restitution in asthma	2.4016e-05	IL-1 beta, Fibronectin, TGF-beta 1, EGFR, IL-1 alpha, MMP-9
27	Cigarette smoke-induced proliferation, metaplasia and survival of airway epithelial cells	2.41423e-05	Keratin 14, Fra-1, Filaggrin, EGFR, Amphiregulin, MMP-9, MMP-2
28	Inflammatory response in ischemia-reperfusion injury during myocardial infarction	2.54535e-05	C5aR, IL-1 beta, C3a, TLR4, C5a
29	Role of fibroblasts in the sensitization phase of allergic contact dermatitis	3.24727e-05	IL-1 beta, Fibronectin, IL-1 alpha, MMP-9, MMP-2
30	Cigarette smoke-induced inflammatory signaling in airway epithelial cells	3.37809e-05	C5aR, IL-1 beta, EGFR, Amphiregulin, GM-CSF, C5a
31	Transcription_HIF-1 targets	4.18066e-05	p21, TGM2, Galectin-1, TGF-beta 1, Adipophilin, 5'-NTD, DEC2, MMP-9, MMP-2
32	Immune response_Th17, Th22 and Th9 cell differentiation	5.41608e-05	AHR, IL-1 beta, GATA-3, TGF-beta 1, CD40(TNFRSF5), CD40L(TNFSF5)
33	Activation of pro-oncogenic TGF-beta potential in gastric cancer	6.27696e-05	Fibronectin, TGF-beta 1, HSP27, MMP-9, MMP-2
34	Maturation and migration of dendritic cells in skin sensitization	7.24966e-05	IL-1 beta, HLA-DRB3, CD83, HLA-DRA1, CD40(TNFRSF5), HLA-DRB5
35	Hedgehog signaling in prostate cancer	7.66144e-05	p21, IBP6, SHH, Bcl-2, GLI-3
36	TGF-beta-induced fibroblast/ myofibroblast migration and extracellular matrix production in asthmatic airways	8.04953e-05	Fibronectin, Tenascin-C, TGF-beta 1, HAS2, MMP-9, TIMP3, MMP-2
37	Epigenetic alterations in ovarian cancer	9.10313e-05	p21, Maspin, Aurora-B, MMP-9, TIMP3, FGFR1, MMP-2, Gamma-synuclein
38	NF-kB-, AP-1- and MAPKs-mediated proinflammatory cytokine production by eosinophils in asthma	9.54714e-05	PRG2, IL-1 beta, GM-CSF, C5a, IL17BR, ENA-78
39	Influence of smoking on activation of EGFR signaling in lung cancer cells	0.000108947	Fra-1, Epiregulin, EGFR, Amphiregulin, MMP-9, MMP-2
40	Tumor-stroma interactions in pancreatic cancer	0.000111251	Fibronectin, TGF-beta 1, SHH, FGFR1, MMP-2
41	Release of pro-inflammatory mediators and elastolytic enzymes by alveolar macrophages in COPD	0.000111251	IL-1 beta, MMP-9, TLR4, GM-CSF, MMP-2
42	Putative pathways of activation of classical complement system in major depressive disorder	0.000111251	C5, IL-1 beta, C3, C3b, C5b
43	Myeloid-derived suppressor cells and M2 macrophages in cancer	0.000122039	IL-1 beta, TGF-beta 1, Calgranulin B, TLR4, GM-CSF, C5a, PD-L1
44	Prostate Cancer: candidate susceptibility genes in inflammatory pathways	0.000132527	IL-1 beta, TLR1, TLR6, IL-1 alpha, TLR4
45	Eosinophil adhesion and transendothelial migration in asthma	0.000179517	C5aR, Fibronectin, C3a, MMP-9, GM-CSF, C5a, C3aR
46	Neutrophil-derived granule proteins and cytokines in asthma	0.000200674	PRG2, TGF-beta 1, Rac2, MMP-9, GM-CSF, C5a
47	Development_Role of proteases in hematopoietic stem cell mobilization	0.000230789	Fibronectin, MMP-9, MMP-14, MMP-2
48	Role of metalloproteases and heparanase in progression of pancreatic cancer	0.000250205	Alpha 1-antitrypsin, EGFR, MMP-9, MMP-14, MMP-2
49	Influence of multiple myeloma cells on bone marrow stromal cells	0.000250205	IL-1 beta, TGF-beta 1, CD40(TNFRSF5), FGFR1, CD40L(TNFSF5)
50	Th2 cytokine- and TNF-alpha-induced profibrotic response in asthmatic airway fibroblasts/ myofibroblasts	0.000279686	IL-1 beta, Tenascin-C, TGF-beta 1, HAS2, MMP-9, MMP-2
Table S2B: Process networks enriched for up-regulated genes.		p-value	genes
1	Proteolysis_Connective tissue degradation	1.91042e-09	Alpha 1-antitrypsin, PLAT (TPA), ADAM-TS15, Fibronectin, Kallikrein 1, Tenascin-C, COL16A1, Kallikrein 6 (Neurosin), SPOCK, Kallikrein 7, MMP-9, ADAM-TS9, ADAM-TS14, TIMP3, Trypsin II, ADAM8, MMP-14, MMP-2
2	Proteolysis_ECM remodeling	3.59493e-07	Alpha 1-antitrypsin, PLAT (TPA), Fibronectin, Tenascin-C, Kallikrein 6 (Neurosin), SPOCK, Kallikrein 7, MMP-9, ADAM-TS14, TIMP3, Trypsin II, MMP-14, MMP-2
3	Inflammation_Complement system	6.21982e-07	MBL2, C5aR, C5, Factor H, C3a, C3, C3b, C5a, C5b, C3aR, iC3b, C3dg
4	Inflammation_Innate inflammatory response	1.55461e-06	IRAK2, C5aR, C5, IL-1 beta, IL1R-rp2, TLR1, TLR5, C3a, APOBEC3G, C3, TLR6, C3b, G-protein alpha-15, IL-1 alpha, TLR4, C5a, C5b, C3aR
5	Inflammation_IL-4 signaling	1.16933e-05	PRG2, HLA-DPA1, TGF-beta 1, p120GAP, HLA-DRA1, GM-CSF, HLA-DPB1, CD40(TNFRSF5), CD74, Bcl-2, c-Fes, CD13, CD40L(TNFSF5)
6	Cell adhesion_Cell-matrix interactions	1.37151e-05	Collagen XIII, Galectin-1, ADAM-TS15, Fibronectin, Sarcospan, Tenascin-C, COL16A1, SPOCK, EGFR, LAMA4, ITGB6, MMP-9, ADAM-TS9, ADAM-TS14, TIMP3, MMP-14, MMP-2, Versican
7	Development_Regulation of angiogenesis	0.000291277	p21, IL-1 beta, ANGPTL4, Reticulon 4, TRIP6, p120GAP, EGFR, IL-1 alpha, MMP-9, SHH, Ephrin-B receptor 1, CD13, MMP-14, GLI-3, MMP-2, CARD11
8	Cell adhesion_Platelet-endothelium-leucocyte interactions	0.00252655	IL-1 beta, PLAT (TPA), Fibronectin, TGF-beta 1, EGFR, Thrombomodulin, MMP-9, CD40(TNFRSF5), Ephrin-B receptor 1, ENA-78, CD40L(TNFSF5), MMP-2
9	Development_Keratinocyte differentiation	0.00449802	p21, Fra-1, GATA-3, Filaggrin, TGF-beta 1, Caspase-14
10	Immune response_Th17-derived cytokines	0.00480067	IL-1 beta, Calgranulin B, NGAL, MMP-9, GM-CSF, Bcl-2, ENA-78, GCP2
11	Proliferation_Positive regulation cell proliferation	0.00662522	p21, Fra-1, VIP receptor 1, PRKAR1B, SCGF, EGFR, G-protein alpha-15, GM-CSF, SHH, FGFR1, VEGF-C, c-Fes, ENA-78
12	Transport_Iron transport	0.00855404	DPYD, CYBRD1, STEAP4, NGAL, 5'-NTD, Melanotransferrin, PRNP, ALOX5
