# Supplementary material for: A Novel Multidrug-Resistant Cell Line from an Italian Intrahepatic Cholangiocarcinoma Patient
Source: Cancers (Basel). 2021 Apr 23;13(9):2051. doi: 10.3390/cancers13092051 (PMC8123022; doi:10.3390/cancers13092051)
Supplement: Supplementary file 1 [file cancers-13-02051-s001.zip › cancers-1197383-supplementary/Table S3.xlsx]

## Sheet: Table S3
Table S3A: Pathway maps enriched for down-regulated genes.
	Pathway maps	p-value	genes
1	Cytoskeleton remodeling_Regulation of actin cytoskeleton nucleation and polymerization by Rho GTPases	7.52732e-06	RhoA, RhoC, RhoD, WASF3 (WAVE3), RhoB, TC10, RhoF (Rif), CYFIP2
2	Neurophysiological process_ACM1 and ACM2 in neuronal membrane polarization	2.71828e-05	RhoA, G-protein alpha-i1, G-protein alpha-q, G-protein alpha-i3, G-protein alpha-i2, PLC-beta1, PLC-beta2
3	PXR-mediated direct regulation of xenobiotic metabolizing enzymes / Rodent version	0.000217967	PXR, UGT1A4, CYP3A5, ABCC2, CYP2B6, UGT1A6
4	Development_S1P2 and S1P3 receptors in cell proliferation and differentiation	0.000251433	RhoA, Transgelin, G-protein alpha-q, G-protein alpha-i2, c-Fos
5	CAR-mediated direct regulation of xenobiotic metabolizing enzymes / Rodent version	0.000251635	ABCC4, CYP3A5, ABCC2, CYP2B6, AL1A1, UGT1A6
6	CAR-mediated direct regulation of xenobiotic metabolizing enzymes / Human version	0.000251635	ABCC4, CYP3A5, ABCC2, CYP2B6, AL1A1, UGT1A6
7	PXR-mediated direct regulation of xenobiotic metabolizing enzymes / Human version	0.000331162	PXR, UGT1A4, CYP3A5, ABCC2, CYP2B6, UGT1A6
8	EGFR signaling pathway in colorectal cancer	0.000383385	Trypsin I, Matrilysin (MMP-7), NT, Amphiregulin, ABCC2, Trypsin II, c-Fos
9	Development_Transcription factors in segregation of hepatocytic lineage	0.000505984	HNF1-beta, Alpha 1-antitrypsin, Activin B, HNF4-alpha, HNF1-alpha
10	Regulation of IGF family activity in colorectal cancer	0.000505984	CEACAM5, p53, Matrilysin (MMP-7), PCSK5, IBP2
11	Development_FGF and BMP signaling in early embryonic hepatogenesis	0.000592284	HNF3-alpha, HNF4-alpha, FGFR4, FGF2, HNF1-alpha
12	Protein folding and maturation_Posttranslational processing of neuroendocrine peptides	0.000862849	NN, NT/NN, PCSK5, NT, LargeNT, LargeNN
13	Pro-oncogenic action of Androgen receptor in breast cancer	0.00105138	FKBP5, Androgen receptor, HNF3-alpha, c-Fos, Kallikrein 3 (PSA)
14	Cell adhesion_Gap junctions	0.00134591	Connexin 32, Connexin 47, Connexin 43, Connexin 45
15	Transcription_HIF-1 targets	0.00135343	Endothelin-1, Galectin-1, p53, FGF2, Stanniocalcin 2, LOXL4, NIP3, CTGF
16	Arachidonic acid production	0.0013669	ELOVL5, PIB4, PLC-epsilon, PLC-eta 1, FADS2, PLC-beta1, PLC-beta2
17	Role of activation of WNT signaling in the progression of lung cancer	0.00172506	HOXB9, Matrilysin (MMP-7), FZD3, FZD9, ARD1, NOTCH3, SFRP1
18	Cytoskeleton remodeling_Regulation of actin cytoskeleton organization by the kinase effectors of Rho GTPases	0.0018913	RhoJ, RhoA, RhoC, RhoB, TC10, WRCH-1
19	L-Tryptophan metabolism (part 1)	0.00215222	ALDR, SLC43A1, TPH1, ALDH2, SLC6A14, MAOA, AL1A1
20	Regulation of metabolism_Bile acids regulation of glucose and lipid metabolism via FXR	0.00217424	HNF3-alpha, HNF4-alpha, HNF3-gamma, ME1, HNF1-alpha
21	Stromal-epithelial interaction in Prostate Cancer	0.0024233	Keratin 17, Androgen receptor, HIC5, FGF2, PDGF-D
22	FGF signaling in Prostate Cancer	0.00269246	Androgen receptor, Matrilysin (MMP-7), FGFR4, FGF2, c-Fos
23	O-glycan biosynthesis	0.00289122	SIA7A, GALNT10, GALNTL4, GALNTL2, GCNT3, GALNTL1
24	Development_S1P1 signaling pathway	0.00298263	RhoA, G-protein alpha-i1, G-protein alpha-i3, G-protein alpha-i2, VAV-1
25	Role of DNA methylation in progression of multiple myeloma	0.00329472	IRF8, p53, DAPK1, NIP3, SFRP1
26	Regulation of Beta-catenin activity in melanoma	0.00338791	Osteopontin, IMP1(ZBP1), NRCAM, MITF
27	Inhibition of remyelination in multiple sclerosis: role of cell-cell and ECM-cell interactions	0.0039883	Connexin 32, Connexin 47, Connexin 43, Connexin 45, HYAL1
28	Transport_Alpha-2 adrenergic receptor regulation of ion channels	0.0039883	G-protein alpha-i1, G-protein alpha-q, G-protein alpha-i3, G-protein alpha-i2, PLC-beta2
29	Neurophysiological process_ACM regulation of nerve impulse	0.00437161	CACNA1I, RhoA, G-protein alpha-q, G-protein alpha-i2, CACNA1H
30	Muscle contraction_S1P2 receptor-mediated smooth muscle contraction	0.00437746	RhoA, G-protein alpha-q, G-protein alpha-i2, PLC-beta1
31	Retinol metabolism	0.00489573	BCDO, CYP3A5, CYP2B6, AL1A1, CYP2C18, RDH11
32	Regulation of lipid metabolism_FXR-dependent negative-feedback regulation of bile acids concentration	0.00493823	HNF3-alpha, HNF4-alpha, PXR, CYP2B6
33	Androstenedione and testosterone biosynthesis and metabolism p.2	0.00554523	AKR1C2, AKR1C1, UGT1A4, AKR1C4
34	Signal transduction_PKA signaling	0.00567836	AKAP12, Androgen receptor, PDE3B, Troponin I, cardiac, GABA-A receptor beta-3 subunit
35	Neurophysiological process_Thyroliberin signaling	0.00601075	Endothelin-1, G-protein alpha-q, G-protein alpha-i3, G-protein alpha-i2, PLC-beta1, c-Fos
36	G-protein signaling_Rac3 regulation pathway	0.00611129	Androgen receptor, HNF1-alpha, PLC-beta2
37	L-Phenylalanine metabolism	0.0064205	SLC43A1, ALDH2, SLC6A14, rBAT, AL1A1, SLC6A20
38	Development_Role of cell-cell and ECM-cell interactions in oligodendrocyte differentiation and myelination	0.0069044	Connexin 32, Connexin 47, Connexin 43, Connexin 45
39	Regulation of AKT(PKB)/ GSK3 beta cascade in bipolar disorder	0.00723889	G-protein alpha-i1, Neuregulin 1, FGF2, G-protein alpha-i3, G-protein alpha-i2
40	G protein-coupled receptors signaling in lung cancer	0.00730034	Endothelin-1, RhoA, NT, Amphiregulin, Galanin, c-Fos
41	G-protein signaling_S1P2 receptor signaling pathway	0.00765963	RhoA, G-protein alpha-q, G-protein alpha-i2, PLC-beta1
42	MAPK-mediated proliferation of normal and asthmatic smooth muscle cells	0.00843167	Endothelin-1, FGF2, Amphiregulin, MKP-1, c-Fos
43	Neurophysiological process_Thyroliberin in cell hyperpolarization and excitability	0.00846723	RhoA, G-protein alpha-q, G-protein alpha-i2, PLC-beta1
44	Gamma-Secretase regulation of neuronal cell development and function	0.00907628	RhoA, Transgelin, Fe65, Neuregulin 1, c-Fos
Table S3B: Process networks enriched for down-regulated genes.		p-value	genes
1	Proteolysis_ECM remodeling	5.03123e-05	Alpha 1-antitrypsin, TFPI-2, Lumican, Matrilysin (MMP-7), Nidogen, Osteopontin, SERPINA3 (ACT), Trypsin II, CTGF, Kallikrein 3 (PSA), Clusterin
2	Development_Blood vessel morphogenesis	0.000563822	Endothelin-1, RhoA, PDE3B, G-protein alpha-i1, Kallikrein 1, PDE9A, Neuregulin 1, DLL4, FGF2, Troponin I, cardiac, Amphiregulin, G-protein alpha-i2, ERAP1, CTGF, Adenosine A2b receptor, c-Fos, Kallikrein 3 (PSA)
3	Cytoskeleton_Actin filaments	0.000964259	RhoJ, Ankyrin-G, Tensin, RhoA, Transgelin, Villin 1, WASF3 (WAVE3), Kindlin-2, MYLK1, Profilin II, Troponin I, cardiac, WaspIP, Brush border myosin I, Tropomyosin-2
4	Proteolysis_Connective tissue degradation	0.00321287	Alpha 1-antitrypsin, TFPI-2, Lumican, Matrilysin (MMP-7), Kallikrein 1, Nidogen, SERPINA3 (ACT), DPP4, Trypsin II, Kallikrein 3 (PSA)
5	Signal Transduction_Cholecystokinin signaling	0.00503634	PIB4, RhoA, G-protein alpha-q, PCSK5, PLC-epsilon, FGF2, PLC-beta1, c-Fos, PLC-beta2
6	Signal transduction_NOTCH signaling	0.00554216	TCF12, p53, FZD3, NOTCH3 (3ICD), Neuregulin 1, HNF4-alpha, DLL4, Amphiregulin, FZD9, PDGF-D, MAGP2, MPDZ, NOTCH3, SFRP1, c-Fos
7	Regulation of metabolism_Bile acid regulation of lipid metabolism and negative FXR-dependent regulation of bile acids concentration	0.00579141	HNF3-alpha, HNF4-alpha, HNF3-gamma, PXR, ME1, HNF1-alpha, CYP2B6
8	Cell adhesion_Integrin-mediated cell-matrix adhesion	0.00588561	ITGB2, Tensin, HIC5, RhoA, Galectin-1, ITGA5, RhoB, Kindlin-2, Profilin II, Osteopontin, VAV-1, Beta-parvin, RhoE, Tetraspanin-8
9	Signal transduction_ESR1-membrane pathway	0.0065333	TFF1, Androgen receptor, RhoA, Neuregulin 1, G-protein alpha-q, PLC-beta1, c-Fos, PLC-beta2
10	Blood coagulation	0.00743291	Protein C receptor (endothelial), Alpha 1-antitrypsin, TFPI-2, HNF4-alpha, G-protein alpha-q, C4BP beta, Annexin IV, P2Y1
